# Supplementary material
Source: PubMed Central journal article supplement (PMC2882451)
Supplement: 100187_2.pdf [file 100187_2.pdf]

## Appendix 2 (as submitted by the authors): Example from the *Canadian Guideline - Recommendation 9 (Optimal Dose)*

Table B-9.1 Opioid Suggested Initial Dose and Titration

Modified from Weaver 2007 with information from the e-CPS (Canadian Pharmacists Association, 2008)

Note: The table is based on oral dosing for chronic non-cancer pain. Brand names are shown if there are some distinct features about specific formulations. Reference to brand names as examples does not imply endorsement of any of these products.

ASA: acetylsalicylic acid, CR = controlled release, IR = immediate release, NA = not applicable

| Opioid                                                      | Initial dose                                                                                                                           | Minimum time interval for increase   | Suggested dose increase                                                                       | Minimum daily dose before converting IR to CR |
|-------------------------------------------------------------|----------------------------------------------------------------------------------------------------------------------------------------|--------------------------------------|-----------------------------------------------------------------------------------------------|-----------------------------------------------|
| Codeine (alone or in combination with acetaminophen or ASA) | 15-30 mg q.4 h. as required                                                                                                            | 7 days                               | 15-30 mg/day up to maximum of 600 mg/day (acetaminophen dose should not exceed 3.2 grams/day) | 100 mg daily                                  |
| CR Codeine                                                  | 50 mg q.12 h.                                                                                                                          | 2 days                               | 50 mg/day up to maximum of 300 mg q.12 h.                                                     | NA                                            |
| Tramadol (37.5 mg) + acetaminophen (325 mg)                 | 1 tablet q.4-6 h. as needed up to 4/day                                                                                                | 7 days                               | 1-2 tab q. 4-6 h. as needed up to maximum 8 tablets/day                                       | 3 tablets                                     |
| CR Tramadol                                                 | a) Zytram XL <sup>®</sup> : 150 mg q. 24 h.<br>b) Tridural <sup>™</sup> : 100 mg q. 24 h.<br>c) Ralivia <sup>™</sup> : 100 mg q. 24 h. | a) 7 days<br>b) 2 days<br>c) 5 days  | Maximum doses:<br>a) 400 mg/day<br>b) 300 mg/day<br>c) 300 mg/day                             | NA                                            |
| IR Morphine                                                 | • 5-10 mg q. 4 h. as needed<br>• maximum 40 mg/day                                                                                     | 7 days                               | 5-10 mg/day                                                                                   | 20-30 mg                                      |
| CR Morphine                                                 | • 10-30 mg q.12 h.<br>• Kadian <sup>®</sup> : q. 24 h.<br>Kadian <sup>®</sup> should not be started in opioid-naïve patients           | Minimum 2 days, recommended: 14 days | 5-10 mg/day                                                                                   | NA                                            |
| IR Oxycodone                                                | • 5-10 mg q. 6 h. as needed<br>• maximum 30 mg/day                                                                                     | 7 days                               | 5 mg/day                                                                                      | 20 mg                                         |
| CR Oxycodone                                                | • 10-20 mg q.12 h.<br>• maximum 30 mg/day                                                                                              | Minimum 2 days, recommended: 14 days | 10 mg/day                                                                                     | NA                                            |
| IR Hydromorphone                                            | • 1-2 mg q. 4-6 h. as needed<br>• maximum 8 mg/day                                                                                     | 7 days                               | 1-2 mg/day                                                                                    | 6 mg                                          |

Appendix to: Furlan AD, Reardon R, Wepler C. Opioids for chronic noncancer pain: a new Canadian practice guideline. *CMAJ* 2010. DOI:10.1503/cmaj.100187.

|                  |                                                                                            |                                         |            |    |
|------------------|--------------------------------------------------------------------------------------------|-----------------------------------------|------------|----|
| CR Hydromorphone | <ul style="list-style-type: none"><li>• 3 mg q. 12 h.</li><li>• maximum 9 mg/day</li></ul> | Minimum 2 days,<br>recommended: 14 days | 2-4 mg/day | NA |
|------------------|--------------------------------------------------------------------------------------------|-----------------------------------------|------------|----|

**Appendix to:** Furlan AD, Reardon R, Wepler C. Opioids for chronic noncancer pain: a new Canadian practice guideline. *CMAJ* 2010. DOI:10.1503/cmaj.100187.

Copyright © 2010, Canadian Medical Association or its licensors
